# Supplementary material for: Organ Donation after Damage Control Strategy in Trauma Patients: Experience from First Level Trauma Center in Italy
Source: MDPI journal article supplement (doi:10.3390/life12020214), 2022-01-30
Supplement: s1 [file s1]

## SUPPLEMENTARY MATERIALS

Table S1. Comparison of HEART DONORS.

| VARIABLE             | HEART (YES)<br>N = 15              | HEART (NO)<br>N = 15               | p-VALUE         |
|----------------------|------------------------------------|------------------------------------|-----------------|
| ED-SBP ADMISSION     | 112.07 ± 30.479<br>(range: 40–150) | 111.67 ± 45.133<br>(range: 40–194) | $p = 0.5609^a$  |
| ED-HR                | 101.47 ± 39.960<br>(range: 0–180)  | 98.33 ± 24.773<br>(range: 61–150)  | $p = 0.6183^a$  |
| ED-BE                | -9.11 ± 8.779<br>(range: -29–4.8)  | -10.69 ± 7.917<br>(range: -30–2.6) | $p = 0.5897^a$  |
| ED-LAC               | 5.39 ± 3.930<br>(range: 1.1–15.4)  | 7.08 ± 5.138<br>(range: 1.1–17)    | $p = 0.4067^a$  |
| ED-MTP               | Yes 14 (93.3%)<br>No 1 (6.7%)      | Yes 11 (73.3%)<br>No 4 (26.7%)     | $p = 0.32950^b$ |
| N° RBC               | 11.00 ± 9.121<br>(range: 2–40)     | 16.07 ± 14.364<br>(range: 2–50)    | $p = 0.3165^a$  |
| VASOACTIVE PH/ED     | Yes 9 (60.0%)<br>No 6 (40.0%)      | Yes 10 (66.7%)<br>No 5 (33.3%)     | $p = 1^b$       |
| NUMBER OF PROCEDURES | 1.27 ± 0.998<br>(range: 0–4)       | 2.07 ± 2.435<br>(range: 0–8)       | $p = 0.6789^a$  |
| ISS                  | 49.33 ± 14.108<br>(range: 25–75)   | 44.93 ± 18.954<br>(range: 17–75)   | $p = 0.3938^a$  |

<sup>a</sup>. Mann–Whitney non-parametric test for unpaired samples; <sup>b</sup>. Two-tailed Fisher's exact test for categorical data.

Table S2. Comparison of KIDNEYS DONORS.

| VARIABLE             | KIDNEY (YES)<br>N = 27           | KIDNEY (NO)<br>N = 3            | p-VALUE            |
|----------------------|----------------------------------|---------------------------------|--------------------|
| ED-MTP               | Yes 24 (88.9%)<br>No 3 (11.1%)   | Yes 2 (66.7%)<br>No 1 (33.3%)   | $p = 0.37055^a$    |
| N° RBC               | 14.38 ± 12.821<br>(range: 2–50)  | 10.00 ± 4.899<br>(range: 4–16)  | $p = 0.7457^b$     |
| VASOACTIVE PH/ED     | Yes 20 (74.1%)<br>No 7 (25.9%)   | Yes 0 (0.0%)<br>No 3 (100.0%)   | $p = 0.03284^{*a}$ |
| NUMBER OF PROCEDURES | 1.88 ± 1.948<br>(range: 0–8)     | 0.33 ± 0.471<br>(range: 0–1)    | $p = 0.0334^{*b}$  |
| ISS                  | 48.27 ± 17.353<br>(range: 17–75) | 43.33 ± 9.741<br>(range: 35–57) | $p = 0.615^b$      |
| KIDNEY INJURY (Y/N)  | Yes 2 (7.4%)<br>No 25 (92.6%)    | Yes 0 (0.0%)<br>No 3 (100.0%)   | $p = 1^a$          |

\* $p < 0.05$ ; <sup>a</sup>. Two-tailed Fisher's exact test for categorical data; <sup>b</sup>. Mann–Whitney non-parametric test for unpaired samples.

Table S3. Comparison of LIVER DONORS.

| VARIABLE             | LIVER (NO)<br>N = 2           | LIVER (YES)<br>N = 28           | p-VALUE         |
|----------------------|-------------------------------|---------------------------------|-----------------|
| ED-MTP               | Yes 2 (100.0%)<br>No 0 (0.0%) | Yes 23 (82.1%)<br>No 5 (17.9%)  | $p = 1^a$       |
| N° RBC               | 16.00 ± 5<br>(range: 11–21)   | 13.36 ± 12.638<br>(range: 2–50) | $p = 0.2415^b$  |
| VASOACTIVE PH/ED     | Yes 1 (50.0%)<br>No 1 (50.0%) | Yes 18 (64.3%)<br>No 10 (35.7%) | $p = 1.00000^a$ |
| NUMBER OF PROCEDURES | 1.50 ± 0.5<br>(range: 1–2)    | 1.68 ± 1.965<br>(range: 0–8)    | $p = 0.549^b$   |

|                    |                               |                                  |                |
|--------------------|-------------------------------|----------------------------------|----------------|
| ISS                | 47.50 ± 9.5<br>(range: 38–57) | 47.11 ± 17.257<br>(range: 17–75) | $p = 0.9667^b$ |
| LIVER INJURY (Y/N) | Yes 0 (0.0%)<br>No 2 (100.0%) | Yes 4 (14.3%)<br>No 24 (85.7%)   | $p = 1^a$      |

<sup>a</sup>. Two-tailed Fisher's exact test for categorical data; <sup>b</sup>. Mann–Whitney non-parametric test for unpaired samples.

**Table S4.** Comparison of LUNGS DONORS.

| VARIABLE             | LUNG (YES)<br>N = 4              | LUNGS (NO)<br>N = 26             | p-VALUE         |
|----------------------|----------------------------------|----------------------------------|-----------------|
| ED-MTP (1-Y/0-N)     | Yes 3 (75.0%)<br>No 1 (25.0%)    | Yes 22 (84.6%)<br>No 4 (15.4%)   | $p = 0.53841^a$ |
| N° RBC               | 5.75 ± 3.031<br>(range: 2–10)    | 14.73 ± 12.739<br>(range: 2–50)  | $p = 0.0701^b$  |
| VASOACTIVE PH/ED     | Yes 3 (75.0%)<br>No 1 (25.0%)    | Yes 16 (61.5%)<br>No 10 (38.5%)  | $p = 1^a$       |
| NUMBER OF PROCEDURES | 1.00 ± 0<br>(range: 1–1)         | 1.77 ± 2.025<br>(range: 0–8)     | $p = 0.7098^b$  |
| ISS                  | 42.50 ± 11.435<br>(range: 25–57) | 47.85 ± 17.428<br>(range: 17–75) | $p = 0.6908^b$  |
| LUNG INJURIES (Y/N)  | N/A                              | N/A                              | N/A             |

<sup>a</sup>. Two-tailed Fisher's exact test for categorical data; <sup>b</sup>. Mann–Whitney non-parametric test for unpaired samples.

### ICU Protocols

#### *Brain Death Donor Management in the Intensive Care Unit*

Brain death causes a marked physiological alteration in many organ systems, especially in the cardiorespiratory and endocrine systems, and in association with the consequences of the trauma poses a particular challenge in the management of these patients. Our approach is a cardiorespiratory and endocrine resuscitation, tailored to the physiopathological characteristics of the patients. The target of our protocol, from a hemodynamic point of view, is to maintain organ perfusion (MAP >70, urine output >0.7 ml/kg/h) through a correction of hypovolemia and judicious use of vasopressors and inotropes, with the help of a multimodal advanced monitoring with PICCO (Pulse Index Continuous Cardiac Output), SVO<sub>2</sub> and lactate. We use a protective ventilator strategy with a Tidal Volume 6–8 ml/kg, keeping a Plateau Pressure <28, Driving Pressure <15, PEEP 5–10 cm H<sub>2</sub>O, and with the use of recruitment maneuvers. All patients receive methylprednisolone 15 mg/kg, thyroid hormones supplementation and desmopressin in case of a diagnosis of diabetes insipidus. Our goal in these cases is to maintain euvolemia and keep sodium 135–150 mEq/l. In patients with trauma-related coagulopathy, we correct with the guidance of thromboelastogram. Red blood cells are transfused to keep the hemoglobin level 10 gr/dl.

**Table S5.** Organ injury: ISS—Injury Severity Score, AIS—Abbreviated Injury Scale.

| Patient ID | ISS | AIS Brain | AIS Liver | AIS Kidney | AIS Lung | AIS Pancreas | AIS Extremities |
|------------|-----|-----------|-----------|------------|----------|--------------|-----------------|
| 1          | 57  | 5         | N/A       | N/A        | 2        | N/A          | N/A             |
| 2          | 34  | 5         | N/A       | N/A        | 0        | N/A          | N/A             |
| 3          | 43  | 5         | N/A       | N/A        | 3        | N/A          | N/A             |
| 4          | 26  | 5         | N/A       | N/A        | 0        | N/A          | 1               |
| 5          | 38  | 5         | N/A       | N/A        | 3        | N/A          | N/A             |
| 6          | 29  | 5         | N/A       | N/A        | 2        | N/A          | N/A             |
| 7          | 75  | 6         | N/A       | N/A        | 0        | N/A          | N/A             |

|    |    |     |     |     |   |     |     |
|----|----|-----|-----|-----|---|-----|-----|
| 8  | 45 | 5   | N/A | N/A | 4 | N/A | 1   |
| 9  | 42 | 5   | N/A | N/A | 4 | N/A | 1   |
| 10 | 57 | 4   | N/A | N/A | 3 | N/A | 5   |
| 11 | 50 | 4   | 3   | N/A | 5 | N/A | 2   |
| 12 | 35 | 5   | N/A | N/A | 3 | N/A | N/A |
| 13 | 35 | 5   | N/A | 3   | 3 | N/A | N/A |
| 14 | 35 | 5   | N/A | N/A | 2 | N/A | N/A |
| 15 | 38 | 5   | N/A | N/A | 3 | N/A | 3   |
| 16 | 59 | N/A | N/A | N/A | 5 | N/A | 5   |
| 17 | 50 | 4   | N/A | N/A | 5 | N/A | 3   |
| 18 | 33 | 5   | N/A | N/A | 2 | N/A | N/A |
| 19 | 75 | 6   | N/A | N/A | 0 | N/A | N/A |
| 20 | 66 | 5   | 2   | N/A | 4 | 2   | 5   |
| 21 | 66 | 5   | 0   | 0   | 4 | N/A | 3   |
| 22 | 75 | 6   | N/A | 2   | 3 | N/A | 2   |
| 23 | 38 | 5   | N/A | N/A | 0 | N/A | 3   |
| 24 | 17 | N/A | 4   | N/A | 2 | N/A | N/A |
| 25 | 25 | 5   | N/A | N/A | 0 | N/A | N/A |
| 26 | 43 | 5   | N/A | N/A | 0 | N/A | N/A |
| 27 | 75 | 6   | N/A | N/A | 2 | N/A | N/A |
| 28 | 20 | N/A | N/A | N/A | 2 | N/A | N/A |
| 29 | 57 | N/A | 2   | N/A | 4 | 3   | 4   |
| 30 | 66 | N/A | N/A | N/A | 4 | 2   | 3   |

**Table S6.** Transplanted organs.

| Patient ID | Heart | Lungs | Liver | Hemiliver | Kidney | Pancreas | Number of<br>Donated<br>Organs |
|------------|-------|-------|-------|-----------|--------|----------|--------------------------------|
| 1          | 1.00  | 2.00  | 1.00  | 0.00      | 0.00   | 0.00     | 4.00                           |
| 2          | 1.00  | 0.00  | 1.00  | 0.00      | 2.00   | 0.00     | 4.00                           |
| 3          | 1.00  | 0.00  | 1.00  | 0.00      | 2.00   | 1.00     | 5.00                           |
| 4          | 0.00  | 0.00  | 1.00  | 0.00      | 2.00   | 0.00     | 3.00                           |
| 5          | 1.00  | 0.00  | 0.00  | 0.00      | 2.00   | 0.00     | 3.00                           |
| 6          | 0.00  | 0.00  | 1.00  | 0.00      | 1.00   | 0.00     | 2.00                           |
| 7          | 0.00  | 0.00  | 1.00  | 0.00      | 2.00   | 0.00     | 3.00                           |
| 8          | 0.00  | 0.00  | 1.00  | 0.00      | 2.00   | 0.00     | 3.00                           |
| 9          | 1.00  | 0.00  | 1.00  | 1.00      | 2.00   | 1.00     | 6.00                           |
| 10         | 0.00  | 0.00  | 0.00  | 0.00      | 2.00   | 1.00     | 3.00                           |
| 11         | 1.00  | 0.00  | 1.00  | 0.00      | 2.00   | 0.00     | 4.00                           |
| 12         | 0.00  | 0.00  | 1.00  | 0.00      | 2.00   | 0.00     | 3.00                           |
| 13         | 1.00  | 2.00  | 1.00  | 1.00      | 2.00   | 1.00     | 8.00                           |
| 14         | 0.00  | 0.00  | 1.00  | 0.00      | 0.00   | 0.00     | 1.00                           |
| 15         | 0.00  | 0.00  | 1.00  | 0.00      | 0.00   | 0.00     | 1.00                           |
| 16         | 1.00  | 0.00  | 1.00  | 0.00      | 2.00   | 0.00     | 4.00                           |
| 17         | 1.00  | 0.00  | 1.00  | 0.00      | 2.00   | 0.00     | 4.00                           |
| 18         | 0.00  | 0.00  | 1.00  | 0.00      | 2.00   | 0.00     | 3.00                           |
| 19         | 0.00  | 0.00  | 1.00  | 0.00      | 2.00   | 0.00     | 3.00                           |
| 20         | 0.00  | 0.00  | 1.00  | 0.00      | 2.00   | 0.00     | 3.00                           |
| 21         | 0.00  | 0.00  | 1.00  | 0.00      | 2.00   | 0.00     | 3.00                           |
| 22         | 1.00  | 0.00  | 1.00  | 0.00      | 2.00   | 0.00     | 4.00                           |
| 23         | 1.00  | 1.00  | 1.00  | 0.00      | 2.00   | 1.00     | 6.00                           |
| 24         | 0.00  | 0.00  | 1.00  | 0.00      | 2.00   | 0.00     | 3.00                           |
| 25         | 1.00  | 2.00  | 1.00  | 1.00      | 2.00   | 1.00     | 8.00                           |
| 26         | 1.00  | 2.00  | 1.00  | 0.00      | 2.00   | 0.00     | 6.00                           |
| 27         | 1.00  | 0.00  | 1.00  | 0.00      | 2.00   | 0.00     | 4.00                           |
| 28         | 0.00  | 0.00  | 1.00  | 0.00      | 2.00   | 0.00     | 3.00                           |
| 29         | 0.00  | 0.00  | 1.00  | 0.00      | 2.00   | 0.00     | 3.00                           |
| 30         | 1.00  | 0.00  | 1.00  | 0.00      | 2.00   | 0.00     | 4.00                           |
